# *Kcnq1ot1* noncoding RNA mediates transcriptional gene silencing by interacting with Dnmt1

Faizaan Mohammad, Tanmoy Mondal, Natalia Guseva, Gaurav Kumar Pandey and Chandrasekhar Kanduri\*

## SUMMARY

A long noncoding RNA, *Kcnq1ot1*, regulates the expression of both ubiquitously and tissue-specific imprinted genes within the *Kcnq1* domain. However, the functional sequences of the *Kcnq1ot1* RNA that mediate lineage-specific imprinting are unknown. Here, we have generated a knockout mouse with a deletion encompassing an 890-bp silencing domain ( $\Delta$ 890) downstream of the *Kcnq1ot1* promoter. Maternal transmission of the  $\Delta$ 890 allele has no effect on imprinting, whereas paternal inheritance of the deletion leads to selective relaxation of the imprinting of ubiquitously imprinted genes to a variable extent in a tissue-specific manner. Interestingly, the deletion affects DNA methylation at somatically acquired differentially methylated regions (DMRs), but does not affect the histone modifications of the ubiquitously imprinted genes. Importantly, we found that *Kcnq1ot1* recruits Dnmt1 to somatic DMRs by interacting with Dnmt1, and that this interaction was significantly reduced in the  $\Delta$ 890 mice. Thus, the ubiquitous and placental-specific imprinting of genes within the *Kcnq1* domain might be mediated by distinct mechanisms, and *Kcnq1ot1* RNA might mediate the silencing of ubiquitously imprinted genes by maintaining allele-specific methylation through its interactions with Dnmt1.

**KEY WORDS:** Noncoding RNA, Epigenetics, Chromatin, Genomic imprinting, *Kcnq1ot1*

## INTRODUCTION

Genomic imprinting is an epigenetic phenomenon in mammals whereby the expression of a subset of autosomal genes is restricted to one of the parental chromosomes such that they are expressed either from the maternal or the paternal chromosome. So far more than 80 imprinted genes have been identified and most often they are organized in clusters. The short stretches of differentially methylated DNA sequences known as imprinting control regions (ICRs) play a crucial role in regulating the imprinting of multiple genes through various mechanisms (Bartolomei, 2009). Interestingly, some of the ICRs that map to introns of protein coding genes act as promoters for long noncoding RNAs (ncRNAs); for example, for *Kcnq1ot1* and *Airn*. Transcription of these long ncRNAs is functionally linked to the epigenetic silencing of multiple genes in cis (Latos and Barlow, 2009; Lewis and Reik, 2006; Mercer et al., 2009; Whitehead et al., 2008).

*Kcnq1ot1* is 91.5 kb ncRNA, which maps to the 1 Mb *Kcnq1* imprinted cluster located at the distal end of mouse chromosome 7 (Pandey et al., 2008; Redrup et al., 2009). The *Kcnq1ot1* promoter maps to the *Kcnq1* ICR and is expressed only from the paternal chromosome, as the ICR is methylated on the maternal chromosome (Smilnich et al., 1999). The expression of *Kcnq1ot1* on the paternal chromosome is functionally linked to the silencing of eight to ten genes in cis (Mancini-Dinardo et al., 2006). The genes that are located near the *Kcnq1ot1* promoter (*Kcnq1*, *Cdkn1c*, *Slc22a18* and *Phlda2*) are imprinted both in the embryo and in the placenta, and hence they are considered to be ubiquitously imprinted genes. By contrast, the genes that are

located far from the *Kcnq1ot1* promoter (*Ascl2*, *Cd81*, *Tssc4* and *Osbpl5*) are imprinted only in the placenta and are considered to be placental-specific imprinted genes (Fig. 1A). Although *Kcnq1ot1* RNA regulates both ubiquitously and placental-specific imprinted genes, the mechanisms regulating these two classes of genes remain unclear.

Long ncRNAs such as *Kcnq1ot1* and *Airn* interact with members of the polycomb repressive complexes (PRC1 and PRC2) and/or with G9a, and recruit these proteins to the promoters of flanking genes to establish repressive chromatin marks (Nagano et al., 2008; Pandey et al., 2008; Terranova et al., 2008; Wagschal et al., 2008). However, the functional sequences within these long ncRNAs that mediate the silencing of cis-linked imprinted genes remain unknown. By using an episome-based system, we have previously shown that an 890 base pair (bp) silencing domain, 610 bp downstream of the *Kcnq1ot1* transcription start site, plays a central role in bidirectional silencing (Mohammad et al., 2008). Here, we show that a targeted deletion of the 890-bp silencing domain in mouse resulted in a selective relaxation of imprinting of the ubiquitously imprinted genes. We found that the 890-bp region regulates the imprinting of ubiquitously imprinted genes by maintaining DNA methylation of the somatic DMRs through interacting with Dnmt1.

## MATERIALS AND METHODS

### Generation of the $\Delta$ 890 mouse

The targeting construct was generated by PCR, by amplifying the flanks from the mouse genomic DNA and ligating them to the 3.6-kb *Kcnq1* ICR, which lacks the 890-bp silencing domain (Mohammad et al., 2008). The loxP-flanked neomycin cassette containing a testis-specific Cre and the neomycin resistance gene was inserted at the point of the deletion. The targeting construct was electroporated into R1 ES cells. After selection with G418, the drug resistant colonies were expanded. Genomic DNAs from the expanded colonies were screened by Southern hybridization for clones with correctly targeted loci by using the probes and strategy shown in Fig. 1A.

Department of Genetics and Pathology, Dag Hammarskjölds Väg 20, 75185 Rudbeck Laboratory, Uppsala University, Uppsala 75185, Sweden.

\*Author for correspondence (kanduri.chandrasekhar@genpat.uu.se)

Two independently targeted ES cell clones were injected into C57BL/6 (B6) blastocysts, which were then transferred to B6 pseudopregnant foster mothers. Male chimeras were mated to B6 mice and their progeny were genotyped using PCR to identify germ-line transmission of the  $\Delta 890$  allele, using the primers listed in Table S1 in the supplementary material. The neomycin cassette was removed in the F1 progeny by the Cre recombinase expressed in the testes of chimeric mice during germline transmission. All animal experiments were performed according to Swedish Animal Board guidelines (application number: C48/8).

### Allele-specific expression analysis

RNA was extracted from E13.5 and E11.5 placenta and liver tissues, dissected from mutant as well as wild-type littermates from crosses between heterozygous mutant mice in the *Mus musculus* (B6) background and wild-type *Mus spretus* (SD7), using the Trizol reagent (Invitrogen). Random primed cDNA was synthesized with Superscript II Reverse Transcriptase (Invitrogen) using 2  $\mu$ g of DNase I (RQ1, Promega)-treated RNA as a template. cDNA was used for quantitative PCR (qPCR) using allele-specific primers (Terranova et al., 2008) (see Table S2 in the supplementary material). Alternatively, RT-PCR was performed using the primers listed in Table S3 in the supplementary material, and the PCR products were directly sequenced.

### DNA methylation analysis

Bisulphite sequencing was performed by converting 1.0  $\mu$ g of genomic DNA using the EpiTest Bisulphite kit (Qiagen). Fragments encompassing the *Cdkn1c* and *Slc22a18* DMRs were amplified using the primers listed in Table S4 in the supplementary material. PCR products were cloned into the pGEM-T Easy vector (Promega) and individual clones were sequenced. Methylation statistics were generated for 10 to 25 unique clones with a

conversion rate above 96% using the BiQ Analyzer software (Bock et al., 2005). SNPs that were used to distinguish parental alleles are shown in Fig. S8 in the supplementary material.

For Southern hybridization (20  $\mu$ g) and qPCR-based quantification of CpG methylation (5.0  $\mu$ g), genomic DNA from E13.5 placenta and liver tissues was digested with appropriate restriction endonucleases. Southern hybridization was carried out as described previously (Chandrasekhar and Raman, 1997). qPCR-based analysis of methylation was performed using primers flanking the methylation-sensitive restriction sites.

### Chromatin immunoprecipitation (ChIP)

ChIP analysis was performed as previously described (Kanduri et al., 2006). Chromatin was immunopurified using antibodies specific for H3K27me3 (Upstate) and Dnmt1 (IMGENEX). qPCR was performed on the purified ChIP material using the primers listed in Table S5 in the supplementary material.

### Chromatin RNA immunoprecipitation (ChRIP) and RNA immunoprecipitation (RIP)

ChRIP and RIP were performed as described previously (Pandey et al., 2008).

### Chromatin conformation capture (3C)

The 3C experiment was performed according to the published protocol (Hagege et al., 2007), using *Bgl*II digested 2% formaldehyde cross-linked chromatin.

## RESULTS AND DISCUSSION

To understand the functional role of the 890-bp silencing domain *in vivo*, we have generated a knockout mouse with an 890-bp deletion through homologous recombination in embryonic stem

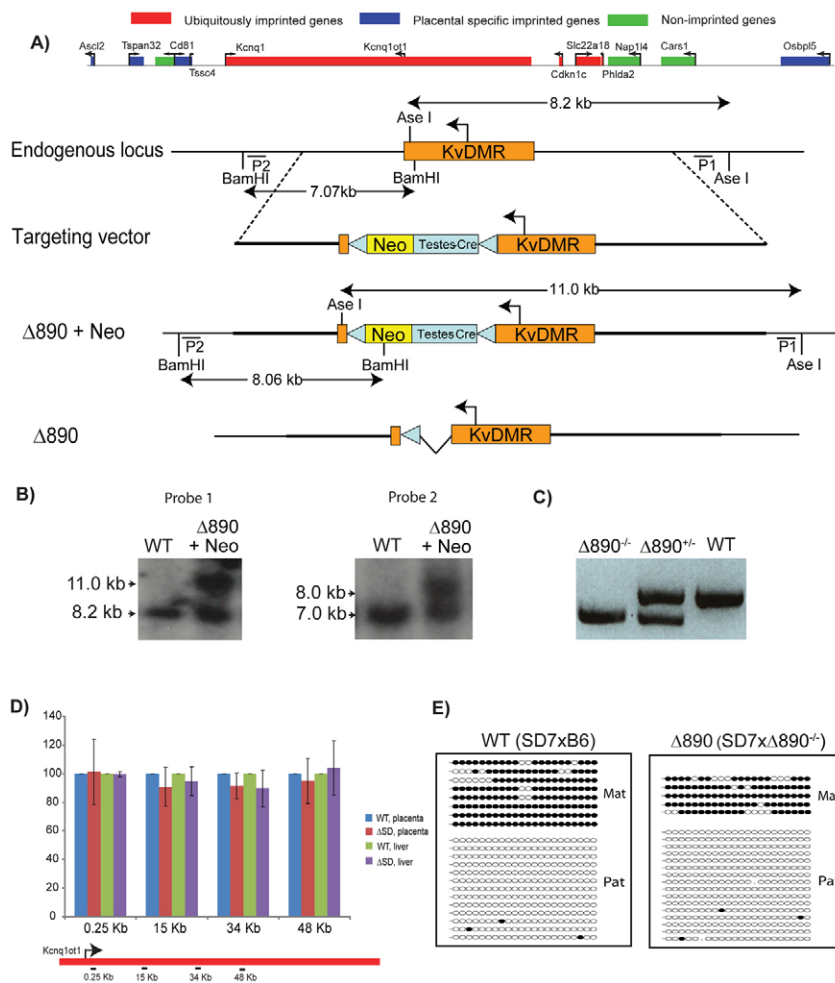

**Fig. 1. Generation of the  $\Delta 890$  mouse.**

(A) Physical map of the *Kcnq1* imprinted locus on mouse chromosome 7. The targeting vector in which the 890-bp region is replaced by the LoxP-flanked neomycin cassette, containing the neomycin resistance gene (*Neo*) and the Cre recombinase gene, driven by a testes-specific promoter is shown below the map. LoxP sites are shown in blue triangles. The targeted loci before ( $\Delta 890 + Neo$ ) and after ( $\Delta 890$ ) the deletion of the testes-specific *Cre-Neo* cassette are shown. The probes used for the Southern analysis (P1 and P2) and the sizes of the restriction fragments detected are indicated. (B) Southern hybridization of DNA derived from the wild-type and the heterozygous  $\Delta 890 + Neo$  ES cells. Genomic DNA was digested with *Bam*HI or *Ase*I, and hybridized with the P1 and P2 probes. (C) Genotyping of mice using a PCR approach (primers are listed in Table S1 in the supplementary material). (D) The effect of an 890-bp deletion on *Kcnq1ot1* RNA expression, analyzed by qRT-PCR. No significant difference between wild-type and mutant tissues was found ( $P > 0.05$ ). Data represent mean  $\pm$  s.d. of three independent biological replicates. (E) CpG island methylation of the *Kcnq1* ICR of wild-type and  $\Delta 890$  crosses, analyzed by bisulphite sequencing using DNA from E13.5 placentas.

(ES) cells (Fig. 1A-C). The homozygous  $\Delta 890$  mice appeared normal and were fertile. The 890-bp deletion had no effect on *Kcnq1ot1* expression or on its promoter methylation (Fig. 1D,E; see also Fig. S1 in the supplementary material). There was no difference in the *Kcnq1ot1* RNA sub-cellular localization or half-life in the  $\Delta 890$  mice when compared with wild-type mice (see Fig. S2A,B in the supplementary material).

**Targeted deletion of the 890-bp region affects the imprinting of ubiquitously imprinted genes in a lineage-specific manner**

We analyzed the effect of the 890-bp deletion on the imprinting of eight maternally expressed genes by crossing the mutant mice (in a *M. musculus* background) with *M. spretus* mice (SD7,

which is a congenic strain containing the distal chromosome 7 of *M. spretus* in the *M. musculus* background). Although the  $\Delta 890$  mice have a mixed genetic background consisting of 129 (129X1/SvJ  $\times$  129S1) and B6, we designated these mice as B6 for simplicity. Allele-specific quantitative RT-PCR analyses were performed to analyze the imprinting pattern at the *Kcnq1* locus (Fig. 2; see also Table S2 in the supplementary material). All of the allele-specific primers used were able to measure *M. musculus* or *M. spretus* RNA specifically, as well as quantitatively (Fig. 2, control panel; see also Fig. S3 in the supplementary material). In addition, allele-specific expression analyses were performed by direct sequencing of the RT-PCR products (see Fig. S4 in the supplementary material). Imprinting assays were also performed in mice with the *Kcnq1ot1* promoter

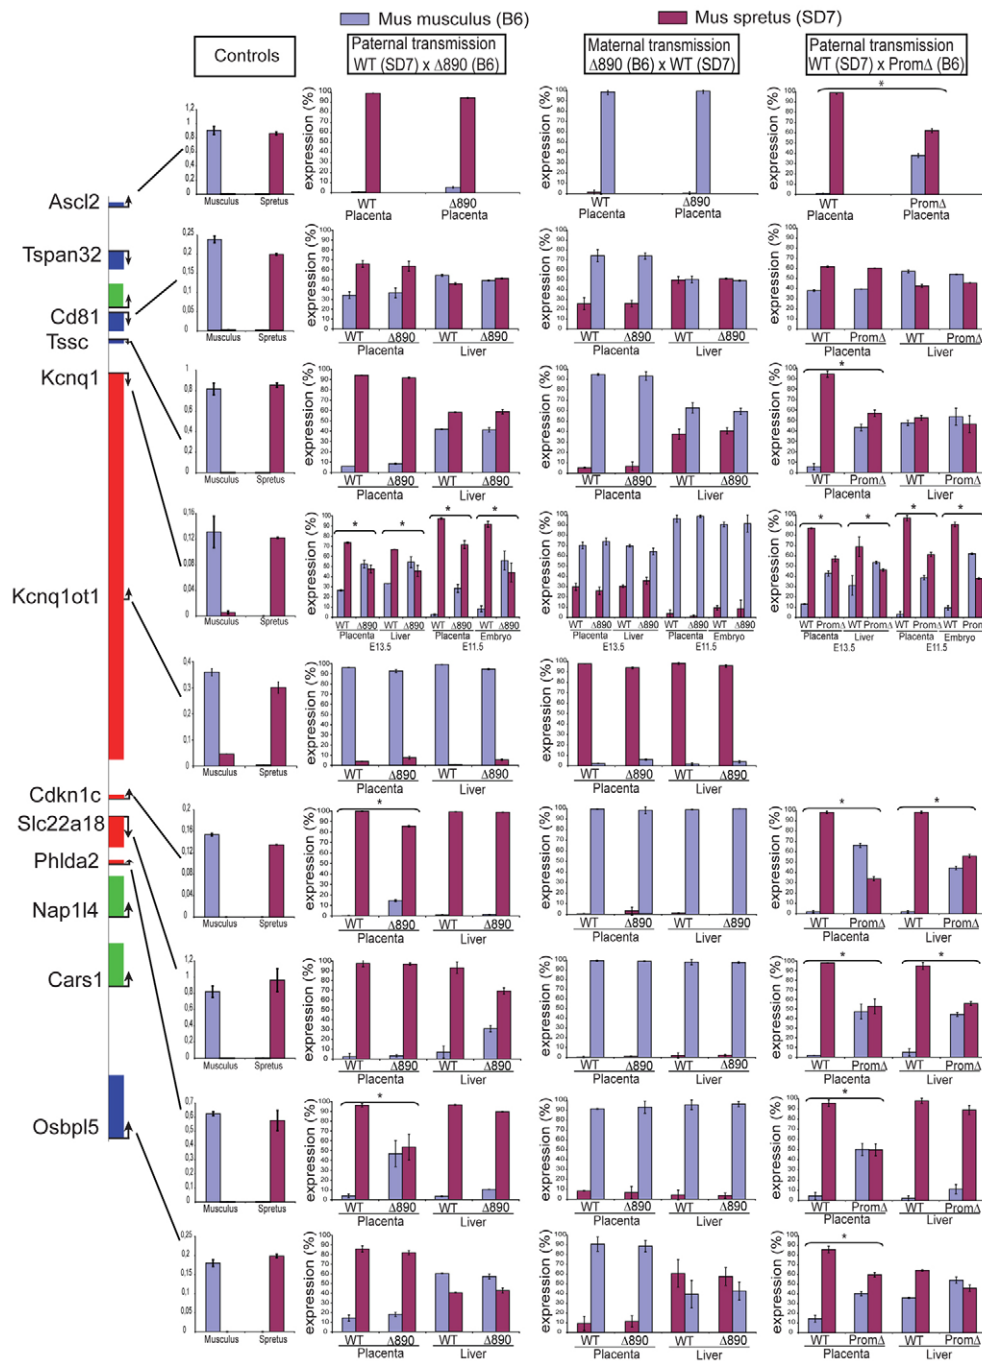

**Fig. 2. The effect of the  $\Delta 890$  deletion on imprinting at the *Kcnq1* locus.** Allele-specific qRT-PCR analysis was performed on RNAs extracted from E13.5 and E11.5 placenta and liver tissues, dissected from mutants as well as their wild-type littermates obtained from crosses between heterozygous mutant mice in the *M. musculus* (B6) background and wild-type *M. spretus* (SD7) mice. The expression from *M. musculus* (blue bars) and *M. spretus* (violet bars) alleles is shown as a percentage. The first panel (Controls) shows specificity and efficiency of the primers (see Table S2 in the supplementary material) used in these analyses. The next three panels show allele-specific expression for imprinted genes from different crosses. The expression data are normalized for the difference in efficiency of the B6- and SD7-specific primers. The second and third panels show the effects on imprinting when the  $\Delta 890$  allele is inherited paternally or maternally, respectively. The fourth panel shows the effect of the paternal transmission of the *Kcnq1ot1* promoter deletion on imprinting in the *Kcnq1* locus. The asterisk indicates a significant change in imprinting pattern ( $P < 0.005$ ). Data represent mean  $\pm$  s.d. of analyses obtained from three independent crosses.



deletion as a control, because the promoter deletion affects both ubiquitously and placental-specific imprinted genes (Mancini-Dinardo et al., 2006).

Paternal transmission of the  $\Delta 890$  allele resulted in the loss of allele-specific expression of the ubiquitously imprinted genes *Kcnq1*, *Cdkn1c*, *Slc22a18* and *Phlda2*, whereas the genes that are imprinted only in placenta (*Ascl2*, *Osbpl5* and *Tssc4*) retained maternal-specific expression in the placenta, indicating that the 890-bp deletion affects primarily the imprinting of ubiquitously imprinted genes (Fig. 2, second panel; see also Fig. S4 in the supplementary material). By contrast, maternal-specific expression of all eight imprinted genes was noted when the  $\Delta 890$  allele was inherited maternally (Fig. 2, third panel; see also Fig. S4 in the supplementary material). In wild-type mice, *Kcnq1* showed partial relaxation of imprinting by E13.5 and, hence, the imprinting analysis was performed using E11.5 mice, where *Kcnq1* showed complete imprinting. Interestingly, *Kcnq1* showed relaxation of imprinting both in placenta and in fetal liver, whereas *Cdkn1c* and *Phlda2* showed relaxation of imprinting only in the placenta, and *Slc22a18* showed relaxation of imprinting only in the fetal liver (Fig. 2A,B). *Cd81* showed biallelic expression with maternal bias in the wild-type placenta and fetal liver, which is consistent with the previously published observations (Lewis et al., 2004). We did not observe any loss of this maternal-biased expression in either the promoter deletion or  $\Delta 890$  mice (Fig. 2). The loss of imprinting of *Phlda2* was specific to placenta, but not to fetal liver, in both the *Kcnq1* promoter deletion and the  $\Delta 890$  mice, indicating that *Kcnq1* RNA-independent mechanisms regulate imprinting at the *Kcnq1* domain in the liver. Taken together, these observations indicate that the 890-bp region is an important functional region of the *Kcnq1* RNA and that its deletion affects the paternal repression of ubiquitously imprinted genes to variable extents in a lineage-specific manner.

The effects of the 890-bp deletion on imprinting are very specific, because a 657-bp deletion that encompasses a region between the *Kcnq1* promoter and the 890-bp region, and that contains conserved MD1 repeats, has no effect on the imprinting of genes within the *Kcnq1* domain, which indicates that the conserved MD1 repeats have no functional role in the establishment or maintenance of imprinting in the *Kcnq1* domain (Mancini-Dinardo et al., 2006).

### The 890-bp region regulates CpG methylation levels of somatically acquired differential methylated regions (somatic DMRs)

Selective loss of the imprinting of the ubiquitously imprinted genes in  $\Delta 890$  mice is comparable to that in *Dnmt1* mutant mice, where loss of imprinting of the ubiquitously imprinted but not placental-specific imprinted genes was observed (Lewis et al., 2004), suggesting that the 890-bp region might function by regulating DNA methylation levels. *Cdkn1c* and *Slc22a18* have somatic DMRs and are methylated on the paternal, but not on the maternal, chromosome in both placenta and embryo (Lewis et al., 2004). The methylation patterns of these DMRs were analyzed using bisulphite sequencing. In the  $\Delta 890$  mice, a decrease in DNA methylation was found over both the DMRs in placenta as well as in fetal liver (Fig. 3A-D). We confirmed the bisulphite sequencing results using two complementary approaches: qPCR-based quantification of methylation and Southern blotting (see Fig. S5A,B in the supplementary material). Although loss of methylation of the *Cdkn1c* and *Slc22a18* DMRs occurred in both placenta and fetal liver, relaxation of imprinting was detected only in the placenta for

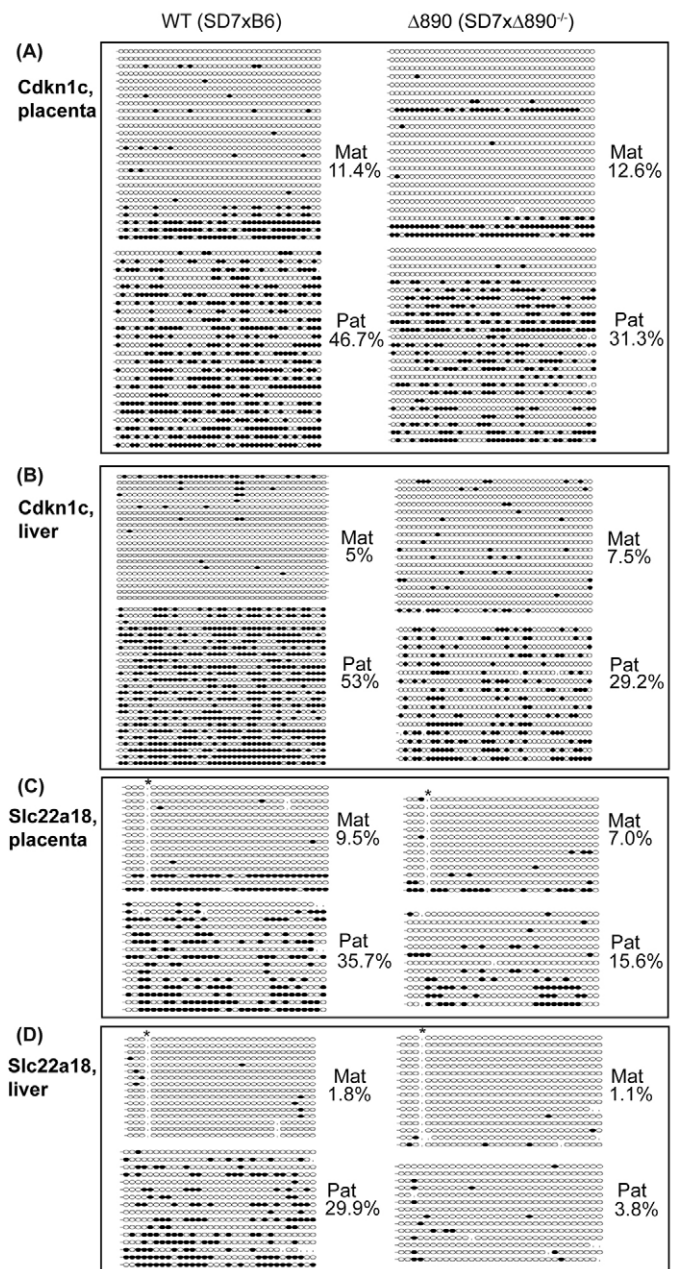

**Fig. 3. The effect of the 890-bp deletion on DNA methylation at the *Kcnq1* locus. (A-D)** Methylation analysis of *Cdkn1c* (A,B) and *Slc22a18* (C,D) DMRs was performed on E13.5 placenta and liver from wild-type and  $\Delta 890$  crosses. The data were collected from two independent biological replicates. The extent of methylation is shown by the percentage for paternal (Pat) and maternal (Mat) alleles, as calculated by the BIQ Analyzer. Single nucleotide polymorphisms (SNPs) between SD7 and B6 were used to distinguish parental alleles. The asterisk indicates the SNP that has affected the CpG in the *Slc22a18* DMR. Solid black circles represent methylated CpGs, whereas empty circles represent unmethylated CpGs. The vertical lines indicate missing CpGs.

*Cdkn1c* and only in fetal liver for *Slc22a18*, indicating that DNA methylation is one of multiple levels of regulation of genomic imprinting at the *Kcnq1* locus and that affecting one of these levels results in a partial relaxation of imprinting.

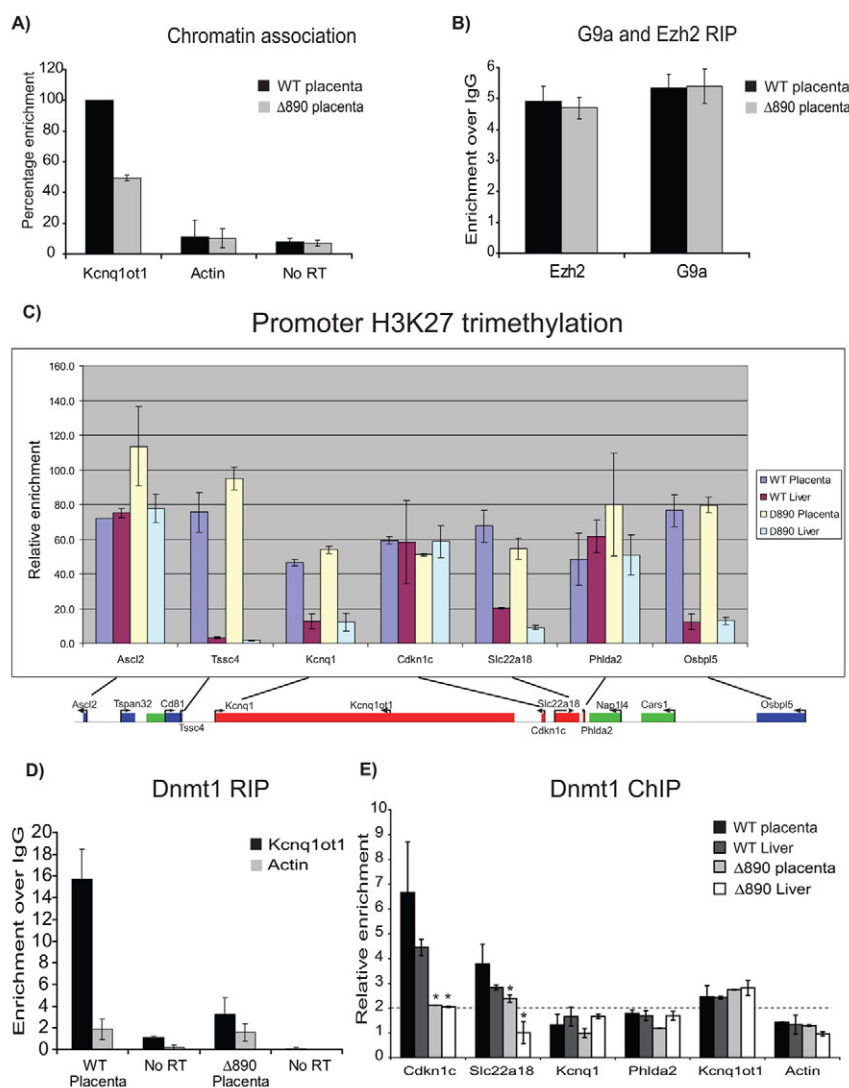

**Fig. 4. The 890-bp region mediates interaction of *Kcnq1ot1* RNA with chromatin and the epigenetic machinery.** (A) A ChRIP assay was performed on placentas from E13.5 fetuses of wild-type (SD7×B6) and Δ890 (SD7×Δ890<sup>-/-</sup>) crosses using anti-H3K27me3. The immunoprecipitated RNAs were converted to cDNA and enrichment of *Kcnq1ot1* RNA was measured by qPCR. In each case, the enrichment over control IgG was normalized to total *Kcnq1ot1* input RNA. β-Actin was used as a negative control. (B) RIP was performed using antibodies against Ezh2 and G9a on DNaseI-treated E13.5 placental lysates of wild-type (SD7×B6) and Δ890 (SD7×Δ890<sup>-/-</sup>) crosses. The enrichment of *Kcnq1ot1* RNA was measured and normalized as in A. (C) ChIP was performed on placenta and liver chromatin, obtained from E13.5 fetuses of wild-type (SD7×B6) and Δ890 (SD7×Δ890<sup>-/-</sup>) crosses. qPCR was performed on the ChIP material using the primers listed in Table S5 in the supplementary material. The enrichment over IgG was normalized to the enrichment of H3K27me3 in the p16 promoter to normalize the pull-down efficiency in each sample. (D) Association of *Kcnq1ot1* RNA with Dnmt1. RIP was performed using anti-Dnmt1 on E13.5 placental lysates of wild-type (SD7×B6) and Δ890 (SD7×Δ890<sup>-/-</sup>) crosses. The enrichment of *Kcnq1ot1* RNA, relative to control IgG RIP, was measured by qRT-PCR. (E) Dnmt1 ChIP was performed on placenta and liver chromatin obtained from E13.5 fetuses of wild-type (SD7×B6) and Δ890 (SD7×Δ890<sup>-/-</sup>) crosses and qPCR was performed using primers spanning the CpG islands of the respective gene promoters. The graph shows enrichment, relative to IgG. The asterisk indicates a significant change in the enrichment ( $P < 0.05$ ). Data are means ± s.d. of three independent biological replicates.

No DNA methylation at the *Kcnq1* and *Phlda2* promoters in either the wild-type or the Δ890 mice was detected by Southern hybridization (data not shown). Although imprinting of *Kcnq1* and *Phlda2* is disrupted in *Dnmt1*<sup>-/-</sup> mice, the promoters of these two genes are not methylated (Yatsuki et al., 2002). It is currently unclear how loss of *Dnmt1* results in the loss of imprinting of *Kcnq1* and *Phlda2*. It is possible that methylation of these promoters is established in early stage embryos, thus establishing a transcriptional memory that could be maintained in the latter stages of embryogenesis in a DNA methylation-independent manner.

### The 890-bp region mediates the interaction of *Kcnq1ot1* RNA with chromatin

*Kcnq1ot1* RNA promotes transcriptional silencing through directly interacting with chromatin and, subsequently, epigenetically modifying the associated chromatin (Pandey et al., 2008). Using an episomal system, we have shown that the chromatin interaction was dependent on the 890-bp region (Mohammad et al., 2008). To address whether the 890-bp deletion modulates the interaction of *Kcnq1ot1* RNA with chromatin in vivo, we performed chromatin RNA immunoprecipitation (ChRIP) on cross-linked chromatin isolated from E13.5 placental tissues of wild-type and Δ890 mice

using an anti-H3K27me3 antibody. H3K27me3 (a repressive chromatin mark) is highly enriched along the *Kcnq1* domain on the paternal chromosome (Pandey et al., 2008; Umlauf et al., 2004). Immunoprecipitation of the *Kcnq1ot1* RNA was reduced by 50% in the Δ890 mice, compared with in the wild-type mice (Fig. 4A), indicating that the 890-bp region mediates the interaction of the *Kcnq1ot1* RNA with chromatin.

### The 890-bp deletion does not affect the repressive histone modification patterns of the *Kcnq1* domain

Chromatin immunoprecipitation (ChIP) was performed on tissues from wild-type and Δ890 mice, using anti-H3K27me3. We found no noticeable difference in the enrichment of H3K27me3 over the imprinted genes within the *Kcnq1* locus between wild-type and Δ890 mice (Fig. 4C), indicating that the 890-bp deletion does not significantly compromise the repressive histone modification levels over the imprinted genes. Consistent with this observation, the 890-bp deletion did not affect the interactions of the histone methyltransferases Ezh2 and G9a with the *Kcnq1ot1* RNA in the E13.5 placenta (Fig. 4B), as detected by RNA immunoprecipitation (RIP). These results are consistent with the lack of major effects on the chromatin status in the Δ890 mice.



### The 890-bp region mediates the interaction between *Kcnq1ot1* RNA and Dnmt1

Our data indicate that the 890-bp region is an important feature of the *Kcnq1ot1* RNA that is required to maintain DNA methylation over some of the ubiquitously imprinted genes, suggesting that the 890-bp region acts through interacting with Dnmt1. Indeed, in our RIP assays, Dnmt1 interacted with wild-type *Kcnq1ot1* RNA, but interaction with the mutant *Kcnq1ot1* RNA was reduced by several fold. These results indicate that the deletion of the 890-bp region probably affects the crucial secondary structure in *Kcnq1ot1* RNA that is required for Dnmt1 interactions (Fig. 4D). The nature of the *Kcnq1ot1* RNA interactions with the DNA methylation machinery is not clear. Although the RIP studies point to a direct interaction between RNA and the methylation machinery, the possibility that Dnmt1 is recruited indirectly via protein-protein interactions cannot be excluded.

We analyzed the recruitment of Dnmt1 to the promoters of ubiquitously imprinted genes in wild-type and  $\Delta 890$  mice. In the wild type, Dnmt1 ChIP analysis showed significant enrichment over the *Cdkn1c* and *Slc22a18* CpG islands, but not over the flanking regions; these CpG islands showed reduced Dnmt1 enrichment in the  $\Delta 890$  mice (Fig. 4E; see also Fig. S6 in the supplementary material). These results are consistent with the loss of methylation over the CpG islands in the  $\Delta 890$  mice.

The effect of the 890-bp deletion on the interaction of *Kcnq1ot1* RNA with Dnmt1 appears to be more profound than the corresponding changes in the methylation status and the imprinting phenotypes. This observation suggests that RNA-independent deposition of Dnmt1 at somatic DMRs might occur.

### Relaxation of the three-dimensionally contracted repressed state of the *Kcnq1* locus in the $\Delta 890$ mice

A recent study demonstrated that *Kcnq1ot1* mediates transcriptional silencing through organizing a higher-order three-dimensionally contracted repressive chromatin compartment (Terranova et al., 2008). To analyze the genomic contraction at the *Kcnq1* locus in the  $\Delta 890$  mice, the chromatin conformation capture (3C) technique, originally developed to detect the frequency of interactions between any two genomic loci (Dekker et al., 2002), was used. qPCR on the 3C template was performed using primers spanning the *Kcnq1* and *Cdkn1c* promoter regions. The quantification by qPCR corresponds to the relative proximity or the contraction between these two genomic regions. Genomic contraction between the *Kcnq1* and *Cdkn1c* genomic regions in wild-type tissues was greater than that in the mutant tissues (see Fig. S7 in the supplementary material), indicating that the 890-bp region is a crucial component regulating the higher-order chromatin structure of the *Kcnq1* locus.

### Conclusions

Our data suggest that *Kcnq1ot1* mediates domain-wide silencing by two distinct mechanisms: DNA methylation and repressive histone modifications. *Kcnq1ot1* regulates the imprinting of placental-specific imprinted genes via the recruitment of histone methyltransferases, such as Ezh2 and G9a, to the promoters. In the  $\Delta 890$  mice, loss of Dnmt1 interaction with the *Kcnq1ot1* RNA, and the corresponding loss of methylation and Dnmt1 enrichment at some of the ubiquitously imprinted gene promoters containing somatic DMRs, indicates that the *Kcnq1ot1* RNA controls the imprinting of ubiquitously imprinted genes via the recruitment of Dnmt1 to somatic DMRs. Notably, the imprinting patterns of ubiquitously imprinted genes but not of placental-specific imprinted

genes are conserved between mouse and human (Monk et al., 2008), indicating that DNA methylation could be the conserved silencing mechanism regulating ubiquitously imprinted genes.

### Acknowledgements

We are grateful to Prof. Shirley Tilghman for providing the *promΔ* mice for our studies and to M. Capecchi for the pACN plasmid. We thank Uppsala University Transgenic Facility, for help with generating the  $\Delta 890$  mouse. This work was supported by the grants from Swedish Medical Research Council, the Swedish Cancer Research Foundation, SciLife Lab, Uppsala and the Swedish Childhood Cancer Foundation.

### Competing interests statement

The authors declare no competing financial interests.

### Supplementary material

Supplementary material for this article is available at <http://dev.biologists.org/lookup/suppl/doi:10.1242/dev.048181/-/DC1>

### References

- Bartolomei, M. S. (2009). Genomic imprinting: employing and avoiding epigenetic processes. *Genes Dev.* **23**, 2124-2133.
- Bock, C., Reither, S., Mikeska, T., Paulsen, M., Walter, J. and Lengauer, T. (2005). BiQ Analyzer: visualization and quality control for DNA methylation data from bisulfite sequencing. *Bioinformatics* **21**, 4067-4068.
- Chandrasekhar, K. and Raman, R. (1997). De novo methylation of the proto-oncogene, *c-fos*, during development occurs step-wise and directionally in the laboratory mouse. *Mol. Reprod. Dev.* **48**, 421-432.
- Dekker, J., Rippe, K., Dekker, M. and Kleckner, N. (2002). Capturing chromosome conformation. *Science* **295**, 1306-1311.
- Hagege, H., Klous, P., Braem, C., Splinter, E., Dekker, J., Cathala, G., de Laat, W. and Forne, T. (2007). Quantitative analysis of chromosome conformation capture assays (3C-qPCR). *Nat. Protoc.* **2**, 1722-1733.
- Kanduri, C., Thakur, N. and Pandey, R. R. (2006). The length of the transcript encoded from the *Kcnq1ot1* antisense promoter determines the degree of silencing. *EMBO J.* **25**, 2096-2106.
- Latos, P. A. and Barlow, D. P. (2009). Regulation of imprinted expression by macro non-coding RNAs. *RNA Biol.* **6**, 100-106.
- Lewis, A. and Reik, W. (2006). How imprinting centres work. *Cytogenet. Genome Res.* **113**, 81-89.
- Lewis, A., Mitsuya, K., Umlauf, D., Smith, P., Dean, W., Walter, J., Higgins, M., Feil, R. and Reik, W. (2004). Imprinting on distal chromosome 7 in the placenta involves repressive histone methylation independent of DNA methylation. *Nat. Genet.* **36**, 1291-1295.
- Mancini-Dinardo, D., Steele, S. J., Levoise, J. M., Ingram, R. S. and Tilghman, S. M. (2006). Elongation of the *Kcnq1ot1* transcript is required for genomic imprinting of neighboring genes. *Genes Dev.* **20**, 1268-1282.
- Mercer, T. R., Dinger, M. E. and Mattick, J. S. (2009). Long non-coding RNAs: insights into functions. *Nat. Rev. Genet.* **10**, 155-159.
- Mohammad, F., Pandey, R. R., Nagano, T., Chakalova, L., Mondal, T., Fraser, P. and Kanduri, C. (2008). *Kcnq1ot1/Lit1* noncoding RNA mediates transcriptional silencing by targeting to the perinucleolar region. *Mol. Cell. Biol.* **28**, 3713-3728.
- Monk, D., Wagschal, A., Arnaud, P., Muller, P. S., Parker-Katiraei, L., Bourc'his, D., Scherer, S. W., Feil, R., Stanier, P. and Moore, G. E. (2008). Comparative analysis of human chromosome 7q21 and mouse proximal chromosome 6 reveals a placental-specific imprinted gene, *TFPI2/Tfpi2*, which requires EHMT2 and EED for allelic-silencing. *Genome Res.* **18**, 1270-1281.
- Nagano, T., Mitchell, J. A., Sanz, L. A., Pauler, F. M., Ferguson-Smith, A. C., Feil, R. and Fraser, P. (2008). The air noncoding RNA epigenetically silences transcription by targeting G9a to chromatin. *Science* **322**, 1717-1720.
- Pandey, R. R., Mondal, T., Mohammad, F., Enroth, S., Redrup, L., Komorowski, J., Nagano, T., Mancini-Dinardo, D. and Kanduri, C. (2008). *Kcnq1ot1* antisense noncoding RNA mediates lineage-specific transcriptional silencing through chromatin-level regulation. *Mol. Cell* **32**, 232-246.
- Redrup, L., Branco, M. R., Perdeaux, E. R., Krueger, C., Lewis, A., Santos, F., Nagano, T., Cobb, B. S., Fraser, P. and Reik, W. (2009). The long noncoding RNA *Kcnq1ot1* organises a lineage-specific nuclear domain for epigenetic gene silencing. *Development* **136**, 525-530.
- Smilnich, N., Day, C., Fitzpatrick, G., Caldwell, G., Lossie, A., Cooper, P., Smallwood, A., Joyce, J., Schofield, P., Reik, W. et al. (1999). A maternally methylated CpG island in KvLQT1 is associated with an antisense paternal transcript and loss of imprinting in Beckwith-Wiedemann syndrome. *Proc. Natl. Acad. Sci. USA* **96**, 8064-8069.
- Terranova, R., Yokobayashi, S., Stadler, M. B., Otte, A. P., van Lohuizen, M., Orkin, S. H. and Peters, A. H. (2008). Polycomb group proteins Ezh2 and Rnf2 direct genomic contraction and imprinted repression in early mouse embryos. *Dev. Cell* **15**, 668-679.

- Umlauf, D., Goto, Y., Cao, R., Cerqueira, F., Wagschal, A., Zhang, Y. and Feil, R.** (2004). Imprinting along the *Kcnq1* domain on mouse chromosome 7 involves repressive histone methylation and recruitment of Polycomb group complexes. *Nat. Genet.* **36**, 1296-1300.
- Wagschal, A., Sutherland, H. G., Woodfine, K., Henckel, A., Chebli, K., Schulz, R., Oakey, R. J., Bickmore, W. A. and Feil, R.** (2008). G9a histone methyltransferase contributes to imprinting in the mouse placenta. *Mol. Cell. Biol.* **28**, 1104-1113.
- Whitehead, J., Pandey, G. K. and Kanduri, C.** (2008). Regulation of the mammalian epigenome by long noncoding RNAs. *Biochim. Biophys. Acta* **1790**, 936-947.
- Yatsuki, H., Joh, K., Higashimoto, K., Soejima, H., Arai, Y., Wang, Y., Hatada, I., Obata, Y., Morisaki, H., Zhang, Z. et al.** (2002). Domain regulation of imprinting cluster in *Kip2/Lit1* subdomain on mouse chromosome 7F4/F5: large-scale DNA methylation analysis reveals that DMR-Lit1 is a putative imprinting control region. *Genome Res.* **12**, 1860-1870.
